# Supplementary material
Source: MDPI journal article supplement (https://www.mdpi.com/1424-8247/14/5/480)
Supplement: s1 [file s1]

**Table S1.** Percent (%) drug remaining in eye drop formulations stored for 6 months under accelerated and long-term storage conditions (n=3, Mean±S.D.).

| Time<br>(months)                           | % drug remaining               |                                  |
|--------------------------------------------|--------------------------------|----------------------------------|
|                                            | 1.5% (w/v) irbesartan eye drop | 0.15% (w/v) candesartan eye drop |
| <i>Accelerated stability (40°C, 75%RH)</i> |                                |                                  |
| 0 Month                                    | 101.69±1.85                    | 95.09±3.41                       |
| 1 Month                                    | 99.23±2.26                     | 87.82±4.53                       |
| 3 Month                                    | 103.70±2.06                    | 84.67±5.28                       |
| 6 Month                                    | 96.35±2.94                     | 82.83±11.55                      |
| <i>Long-term stability (25°C, 60%RH)</i>   |                                |                                  |
| 0 Month                                    | 101.69±1.85                    | 95.09±3.41                       |
| 1 Month                                    | 100.22±1.69                    | 95.37±4.27                       |
| 3 Month                                    | 102.76±1.68                    | 87.72±5.38                       |
| 6 Month                                    | 100.67±4.55                    | 88.56±5.15                       |
